# Supplementary material for: US Pediatric Primary Care Physician Workforce in Rural Areas, 2010 to 2020
Source: PubMed Central journal article supplement (PMC10500373; doi:10.1001/jamanetworkopen.2023.33467), 2023-09-13
Supplement: jamanetwopen-e2333467-s001.pdf [file jamanetwopen-e2333467-s001.pdf]

## Data Sharing Statement

Ramesh. US Pediatric Primary Care Physician Workforce in Rural Areas, 2010 to 2020. *JAMA Netw Open*. Published September 13, 2023. doi:10.1001/jamanetworkopen.2023.33467

### Data

**Data available:** Yes

**Data types:** Other (please specify)

**Additional Information:** This study used publicly available data, which can be downloaded at the websites below.

**How to access data:** Health Resources and Services Administration's (HRSA) Area Health Resources Files (AHRF) are available at: <https://data.hrsa.gov/topics/health-workforce/ahrf>

American Community Survey 5-year estimates are available at:

<https://www.census.gov/data/developers/data-sets/acs-5year.html>

**When available:** With publication

### Supporting Documents

**Document types:** None

### Additional Information

**Who can access the data:** anyone requesting the data

**Types of analyses:** For research only

**Mechanisms of data availability:** Without investigator support
